# Supplementary material
Source: PubMed Central journal article supplement (PMC6777812)
Supplement: jciinsight-4-122112-s213.pdf [file jciinsight-4-122112-s213.pdf]

**Supplemental information**

**Targetable Purinergic Receptors P2Y<sub>12</sub> And A2b Antagonistically**

**Regulate Bladder Function**

Yuan Hao<sup>1#</sup>, Lu Wang<sup>1#</sup>, Huan Chen<sup>1</sup>, Warren G. Hill<sup>1</sup>, Simon C. Robson<sup>1</sup>, Mark  
L. Zeidel<sup>1</sup>, Weiqun Yu<sup>1\*</sup>

<sup>1</sup>Department of Medicine, Beth Israel Deaconess Medical Center and Harvard  
Medical School, Boston, Massachusetts;

Supplemental figure 1. Genotyping of P2Y<sub>12</sub>KO (A) and A2bKO (C) mice. (B) and (D) mRNA expression by RT-PCR for P2Y<sub>12</sub>KO and A2bKO mice. (E)  $\beta$ -Gal staining of A2bKO BSM.

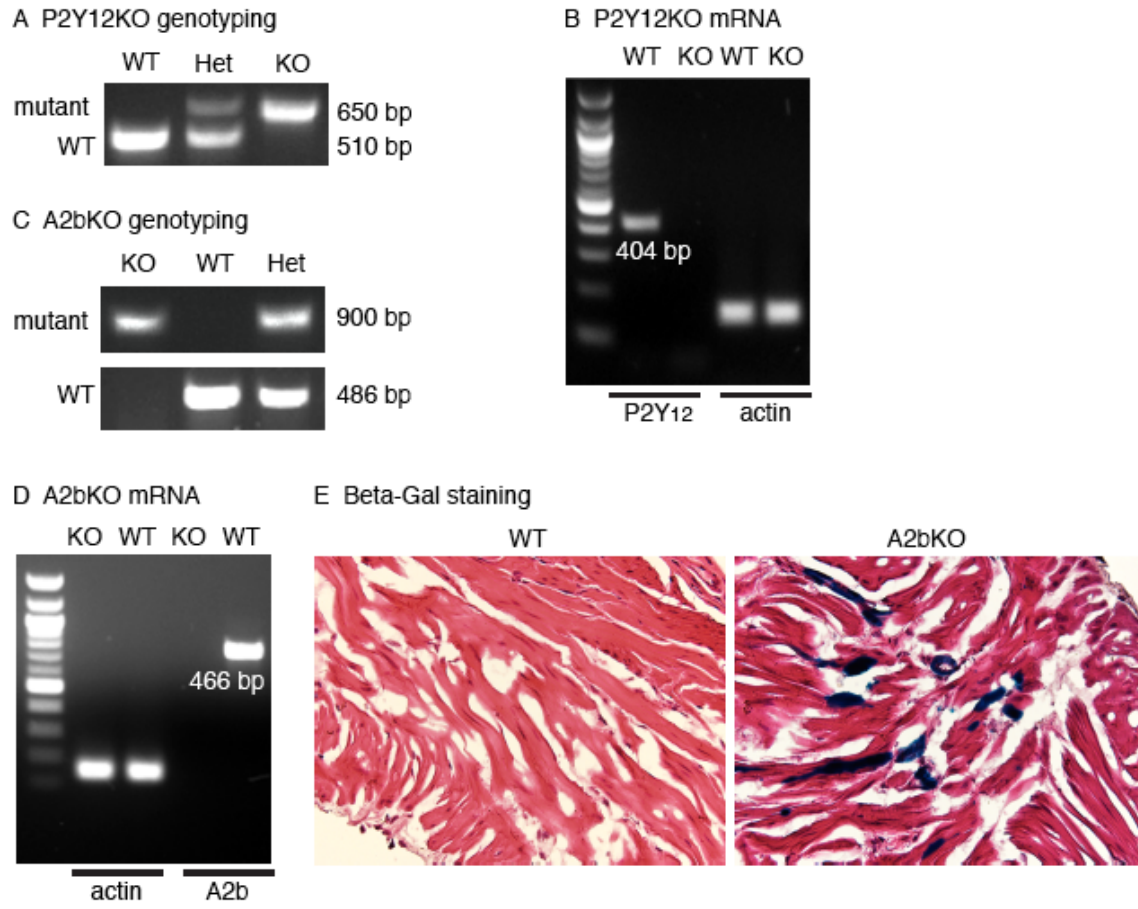

Supplemental figure 2. Male P2Y<sub>12</sub>KO and A2bKO mice exhibit altered bladder function. (A-C) are representative images of VSA filter papers from wild-type (n=11), P2Y<sub>12</sub>KO (n=7), and A2bKO (n=22) mice respectively, which are quantitated in (D-F). The square at bottom right corner of panel (A) (surface area of 400 mm<sup>2</sup>) serves as a size standard. Primary void spots (PVS) are defined as spots >80 mm<sup>2</sup>. Data are shown as Box and Whiskers, whiskers are from Min to Max, Student's t-test is used to compare between wild type and knock out animals, and \* indicates P<0.05.

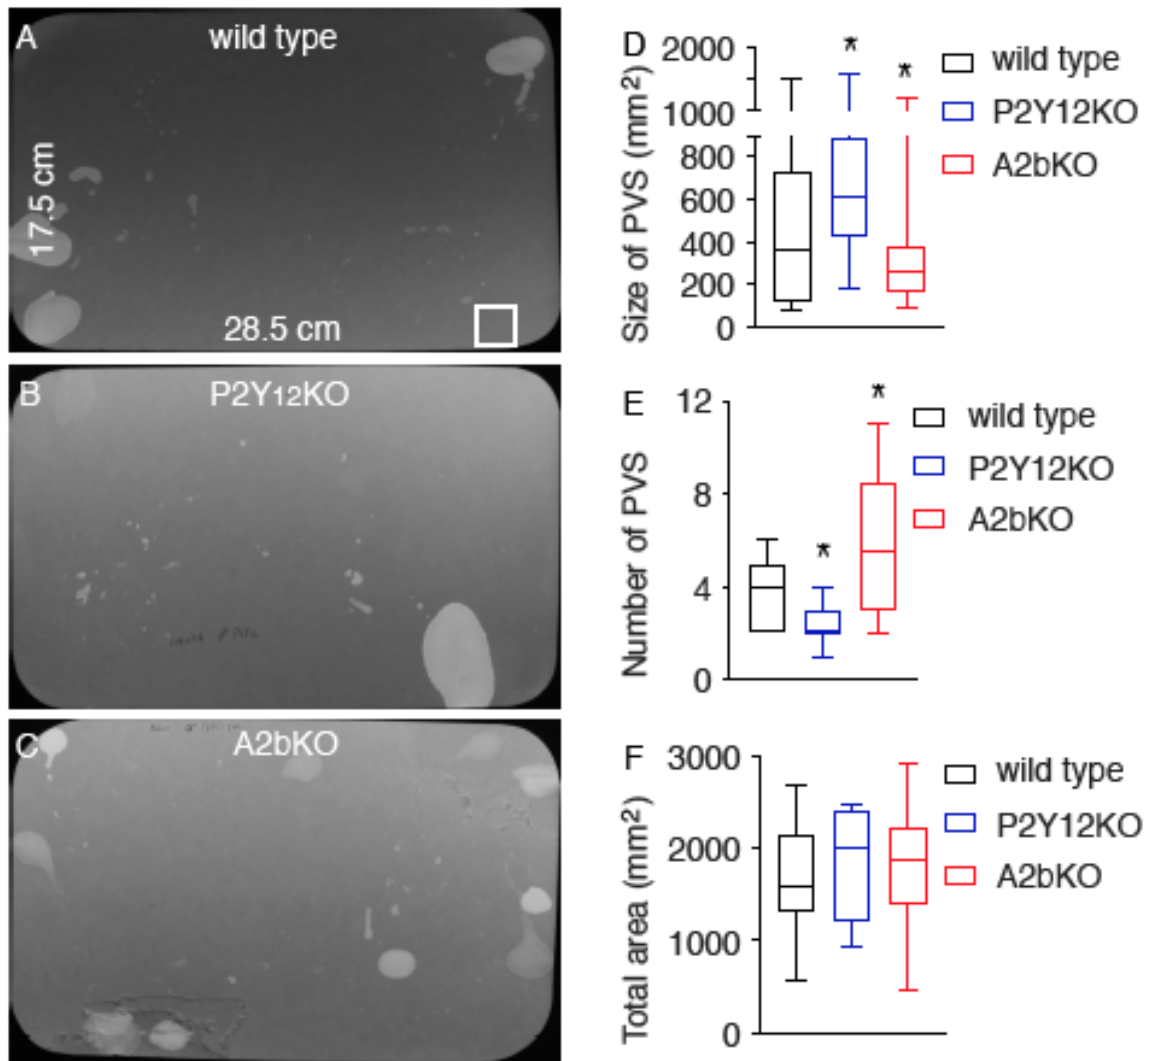

Supplemental figure 3. An enlarged view of Ki67 staining and nuclei co-localization. (A) Ki67 immuno-staining which is co-localized with nuclei (B). (C) merged image. White arrows indicate merged signaling.

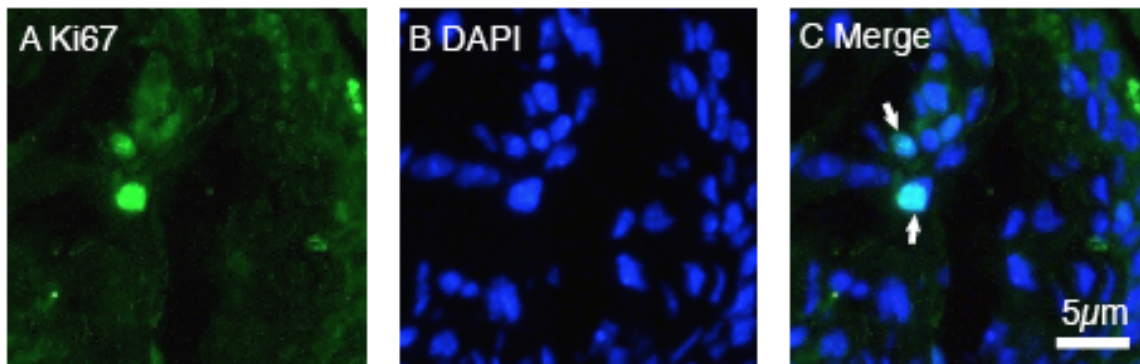

Supplemental figure 4. Quantitative RT-PCR of mRNA from wild type, P2Y<sub>12</sub>KO, and A2bKO mice bladders. n=3. Data are shown as Box and Whiskers, whiskers are from Min to Max, Student's t-test is used to compare between wild type and knock out animals, and \* indicates P<0.05.

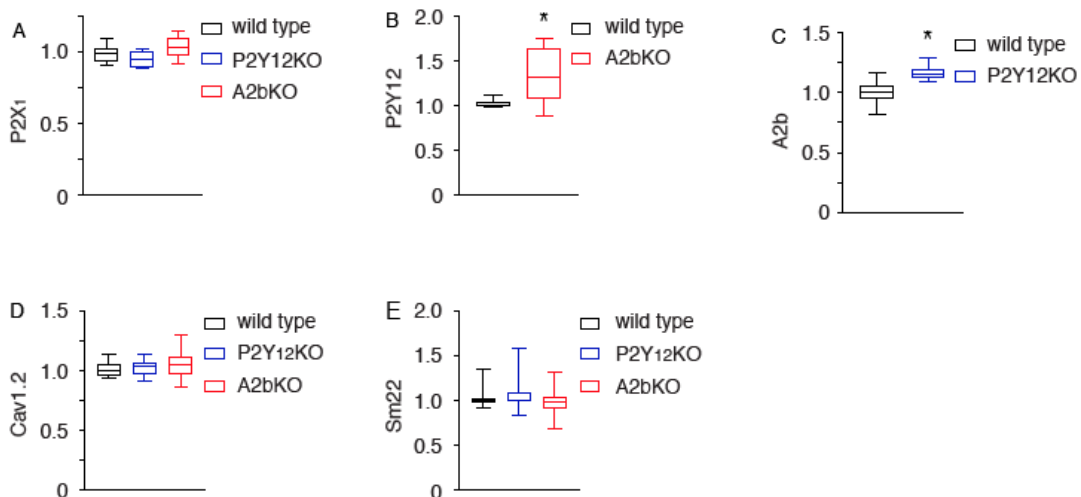

Supplemental figure 5. (A) Western blots of proteins from wild type, P2Y<sub>12</sub>KO, and A2bKO mice bladders. n=6. (B-D) Densitometric quantitation with normalization to  $\beta$ -actin. Data are shown as Box and Whiskers, whiskers are from Min to Max, Student's t-test is used to compare between wild type and knock out animals, and \* indicates P<0.05.

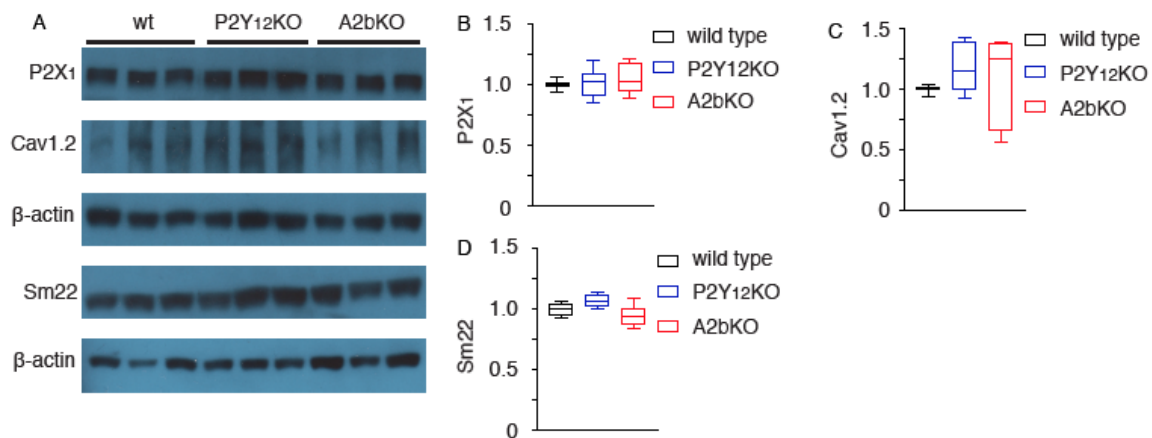

Supplemental figure 6. Urine osmolality and chemistry was determined in both male (M below X-axis) and female (F below X-axis) mice (A, C, E, G, I, K), including wild type control: F=36, M=33; P2Y<sub>12</sub>KO: F=17, M=19; and A2bKO: F=15, M=16). Effect of A2b agonist Bay 60-6583 (F=36, M=24) on urine osmolality and chemistry was also evaluated in comparison to wild type mice with vehicle (10  $\mu$ l DMSO) treatment (B, D, F, H, J, L). Data are shown as Box and Whiskers, whiskers are from Min to Max, Student's t-test is used to compare between wild type and knock out animals, and \* indicates P<0.05.

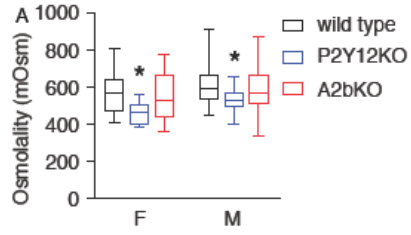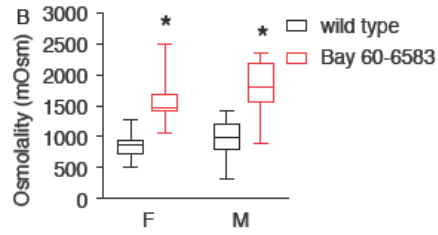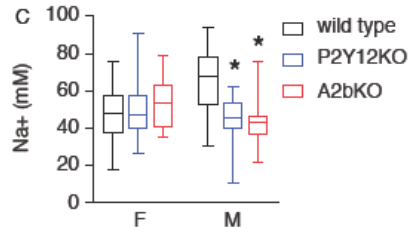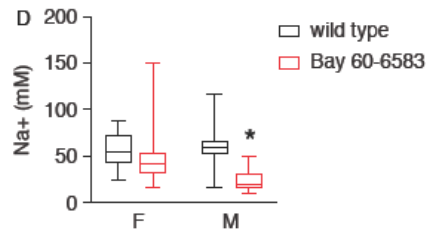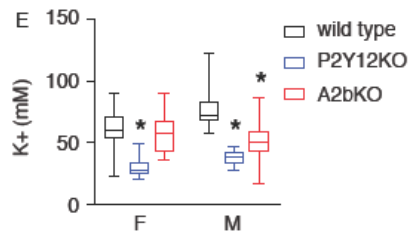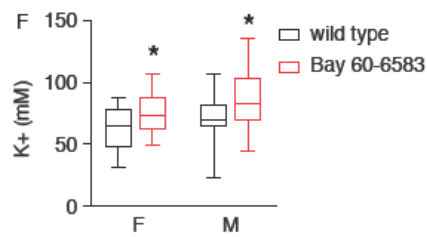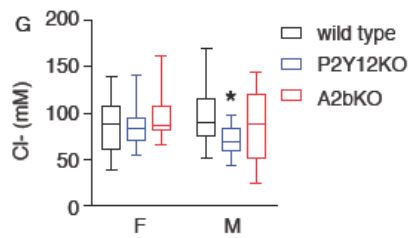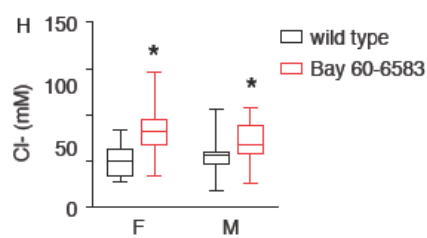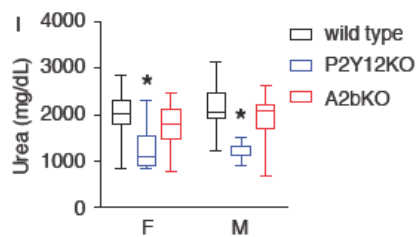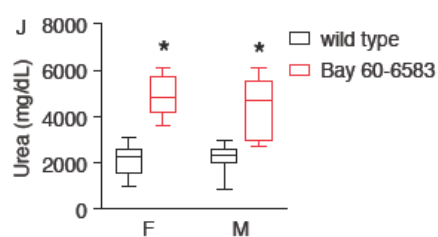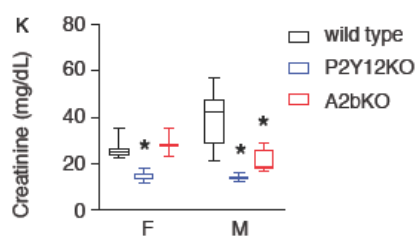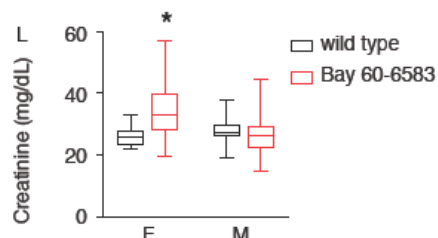

Supplemental table 1, Quantitative RT-PCR for Hippo pathway genes. Data shown is mean  $\pm$  SD, Student's t-test is used to compare between wild type and knock out animals, and \* indicates  $P < 0.05$ .

| Genes | Wild type (n=5) |      | P2Y <sub>12</sub> KO (n=6) |      | A2bKO (n=5) |      |
|-------|-----------------|------|----------------------------|------|-------------|------|
|       | Mean            | SD   | Mean                       | SD   | Mean        | SD   |
| MST1  | 1.00            | 0.03 | 1.14                       | 0.31 | 1.03        | 0.16 |
| MST2  | 1.00            | 0.02 | 1.29*                      | 0.31 | 1.14*       | 0.14 |
| YAP   | 1.00            | 0.03 | 1.05                       | 0.17 | 1.02        | 0.10 |
| TAZ   | 1.00            | 0.05 | 1.28*                      | 0.23 | 0.98        | 0.13 |
| LAST1 | 1.00            | 0.03 | 1.13                       | 0.24 | 1.00        | 0.16 |
| LAST2 | 1.00            | 0.04 | 1.16                       | 0.36 | 1.03        | 0.36 |
| TEAD1 | 1.00            | 0.06 | 1.07                       | 0.35 | 1.05        | 0.19 |
| TEAD2 | 1.00            | 0.05 | 0.98                       | 0.15 | 0.92        | 0.12 |
| TEAD3 | 1.00            | 0.02 | 0.94                       | 0.25 | 1.02        | 0.05 |

Supplemental materials:

1. Primers used for genotyping:

A2b

|                        |                                 |       |
|------------------------|---------------------------------|-------|
| CTCACACAGAGCTCCATCT    | A2b wt F genotyping             |       |
| TCTGGCAGCAGCTTTGAT     | A2b wt R genotyping             | 485bp |
| CAGCCTCTGTTCCACATACACT | A2b <sup>-/-</sup> F genotyping |       |
| GGCACCTCTCCCTCCAAGACAC | A2b <sup>-/-</sup> R genotyping | 900bp |

P2Y<sub>12</sub>

|                          |                              |
|--------------------------|------------------------------|
| ACGCGTCACCTTAATATGCG     | P2Y <sub>12</sub> genotyping |
| GGCACTCTAGTGATGCTTTGCCTA | P2Y <sub>12</sub> genotyping |
| GGCTGCCTTGAGAAATATCAAGT  | P2Y <sub>12</sub> genotyping |

WT 510 bp

Mut 650 bp

2. Primers used for regular RT-PCR of mRNA of P2Y<sub>12</sub>, A2b, and positive control gene  $\beta$ -actin

P2Y<sub>12</sub> 404 bp

GAGACACTCATATCCTTCAGATTC  
CCCAGGAACGATATACTGATATAC

A2b 466 bp

TCTATTCAGCTGCTCTTACTGTGT  
ATTTTCACACTTTAGGTCCCAATA

Actin 147 bp  
ACC TTC TAC AAT GAG CTG CG  
CTG GAT GGC TAC GTA CAT GG

### 3. Primers used for quantitative RT-PCR

P2X<sub>1</sub>  
GGT GTT TGG GAT TCG CTT TG  
GCA GGA TGT GGA GCA ATA AGA G

P2Y<sub>12</sub>  
GCT TTG TTC CCT TCC ACT TTG  
GTG CTC TCC TTC ACG TAG AAC

A2b  
GTCCCGCTCAGGTATAAAGGT  
CAGTTCTGTGCAGTTGCTGG

c-Jun  
GTT GAA AGC TGT ATG AAG TGG C  
TCA AAG TTG GAA GGA GAC ACC

c-Fos  
TCC AGT CCT CAC CTC TTC C  
AAG AGA AAA GAG ACA CAG ACC AG

Cav1.2  
CTT GAA ATC CAC CTA CCA GAC C  
CCT CAC TGT TTC TCT GTC ATC TG

Mst1  
GGATTTTGTGAAGCAGTGTCTG  
CGCTTCAGTTTCACATCCATG

Mst2  
CAGCACCATGTTAGAGTCGG  
TGTA CTTGAGGTGACGTTGC

Lats1  
TGCGAACAGGATATACACAGC  
GTGAAGAGAAGTTTGCCAGTTG

Lats2  
GACACCAAATTACATCGCTCC  
TCAAAGAGAATCACACCGACG



Taz  
ATGAGTTCTGAGTTCCTGCG  
GAAGTAGGGTGGGCTGTTAG

Yap  
ACCAATAGTTCCGATCCCTTTC  
TGTCTCCTGTATCCATTTTCATCC

Tead1  
GAATAAACCGCTCGCCAATG  
GAGTTTCTTGTGTATCCCTGTTTG

Tead2  
CCTGGTTAATTTCCCTGCACAAG  
GTGGAGACTTCAAAGACGTAGG

Tead3  
TGGAGTATTCTGCCTTCATGG  
GGAAGTTCGTCGTAGATCTGTCCG

SM22 $\alpha$   
ATGTTCCAGACTGTTGACCTC  
GTGAAGTCCCTCTTATGCTCC

SDHA  
CTT GAA TGA GGC TGA CTG TG  
ATC ACA TAA GCT GGT CCT GT

#### 4. Antibodies used for western blots.

Antibodies used for western blots: purified polyclonal rabbit anti-P2X<sub>1</sub> antibody (Catalogue #: APR-001, Alomone Labs); purified monoclonal rabbit anti-c-Fos (Catalogue #: 2250), purified monoclonal rabbit anti-c-Jun (Catalogue #: 9165), purified monoclonal rabbit anti- $\alpha$ -Sm22 (Catalogue #: 19245), and purified polyclonal rabbit anti- $\beta$ -actin (Catalogue #: 4967) are from Cell Signaling Technology; purified polyclonal rabbit anti-Cav1.2 antibody (Catalogue #: AB5156, Millipore); and Immun-Star goat anti-rabbit (GAR)-HRP conjugate

(Catalogue#: 1705046, Bio-Rad). Antibodies are chosen based on our or other reported references which were verified by knockouts or artificial expression systems.

#### 5. Measurement of urine osmolality and chemistry.

Individual mice were placed in a clean standard AN75 mouse cage without bedding materials, and spontaneously voided urine was collected immediately using a 200  $\mu$ l pipette for 2 h. Mice were given standard chow and water for the duration of the collection. Urine osmolality was measured by freezing point osmometry (Osmette A, Precision Systems, Natick, MA) according to the manufacturer's instructions. Urine chemistry was determined by an Electrolyte Analyzer 16+ (Nova biomedical, Waltham, MA) according to the manufacturer's instructions.
